# Supplementary material
Source: ML conference proceedings conference paper supplement (https://openaccess.thecvf.com/content/ICCV2023/html/Xu_Animal3D_A_Comprehensive_ICCV_2023_paper.html)
Supplement: Supplementary file 1 [file Xu_Animal3D_A_Comprehensive_ICCV_2023_supplemental.pdf]

## Supplementary Material for Animal3D

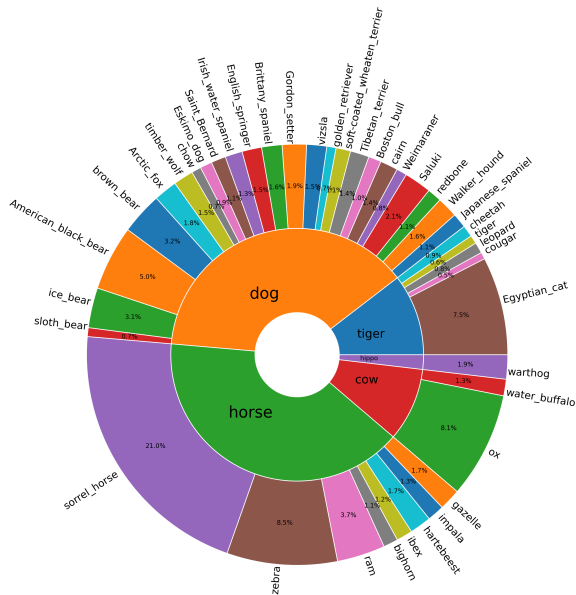

Figure 1. Dataset statistics of Animal3D. There are totally 40 ImageNet classes, which are categorized into 5 families.

As shown in Figure 1, Animal3D contains a total of 3379 of images, which are classified according to the official ImageNet labels. We further categorize all animal classes into five “families” (dog, tiger, cow, horse, hippo) that summarize objects with a similar overall shape.
